# Supplementary material for: Call-Center Labor Cross-Training: It’s a Small World After All
Source: Atypon-hosted journal article supplement (doi:10.1287/mnsc.1060.0621), 2007-07-01

**e-companion**

ONLY AVAILABLE IN ELECTRONIC FORM

Electronic Companion—“Call-Center Labor Cross-Training: It’s a Small World After All” by Seyed M. R. Iravani, Bora Kolfal, and Mark P. Van Oyen, *Management Science* 2007, 53(7) 1102–1112.

**Online Appendix**

**Figure EC.1 Structures for Demand Vector  $\mathcal{D}_2 = (1.5, 1.5, 1.5, 0.5, 0.5, 0.5)$**

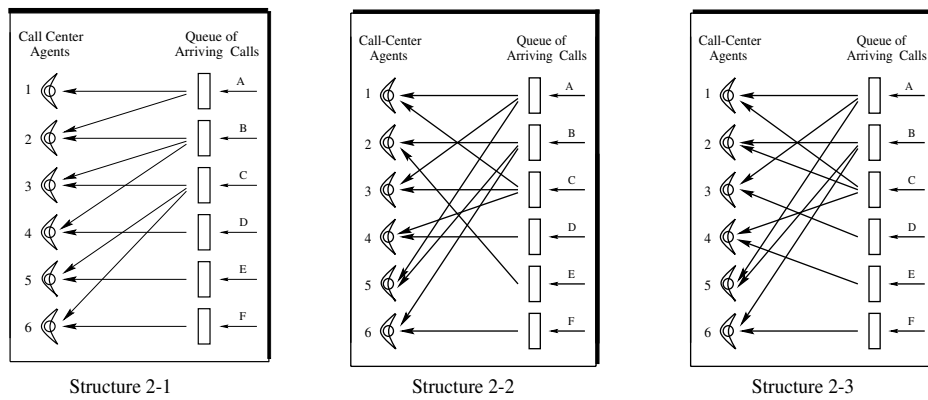

**Figure EC.2 WS Networks for Demand Vector  $\mathcal{D}_2 = (1.5, 1.5, 1.5, 0.5, 0.5, 0.5)$**

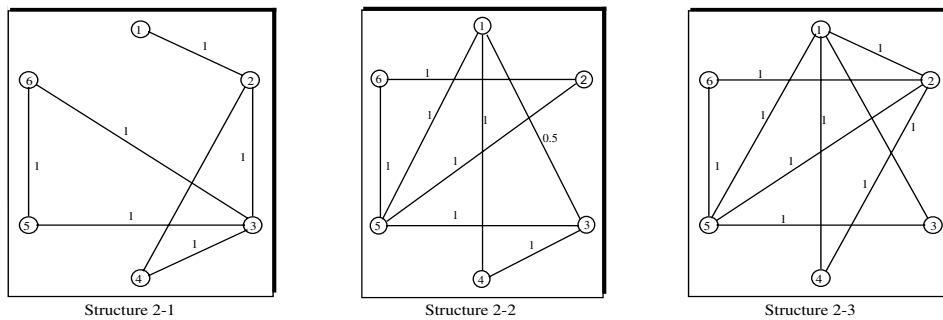

**Figure EC.3 Structures for Demand Vector  $\mathcal{D}_3 = (1.5, 1, 0.5, 0.5, 1, 1.5)$**

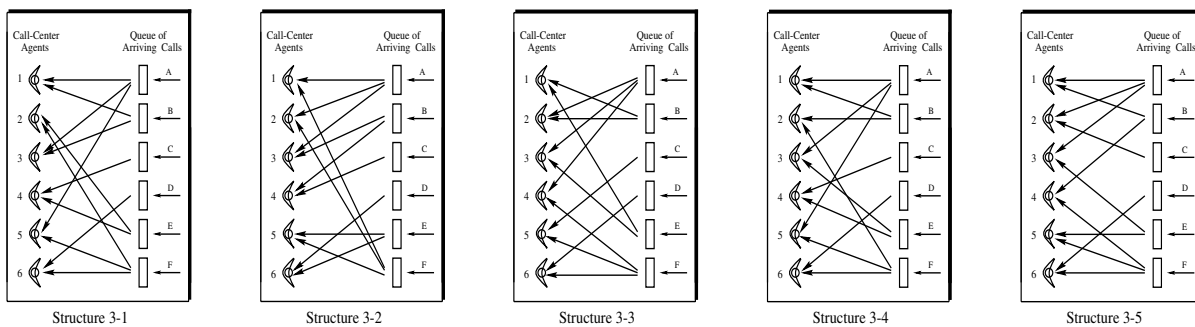

**Figure EC.4** WS Networks for Demand Vector  $\mathcal{D}_3 = (1.5, 1, 0.5, 0.5, 1, 1.5)$

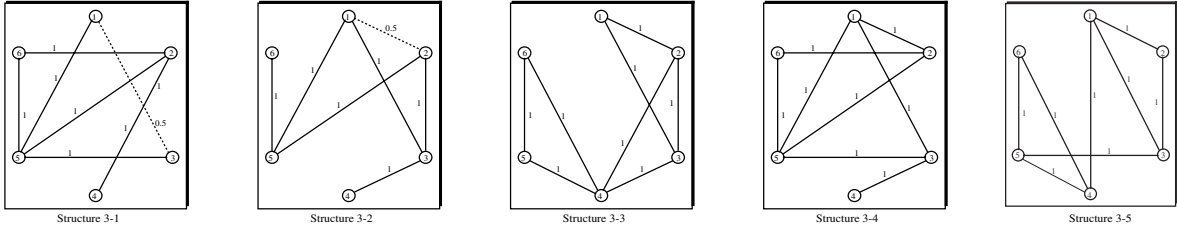

**Figure EC.5** Structures for Demand Vector  $\mathcal{D}_4 = (0.5, 0.5, 1, 1, 2, 2, 1, 1, 0.5, 0.5)$

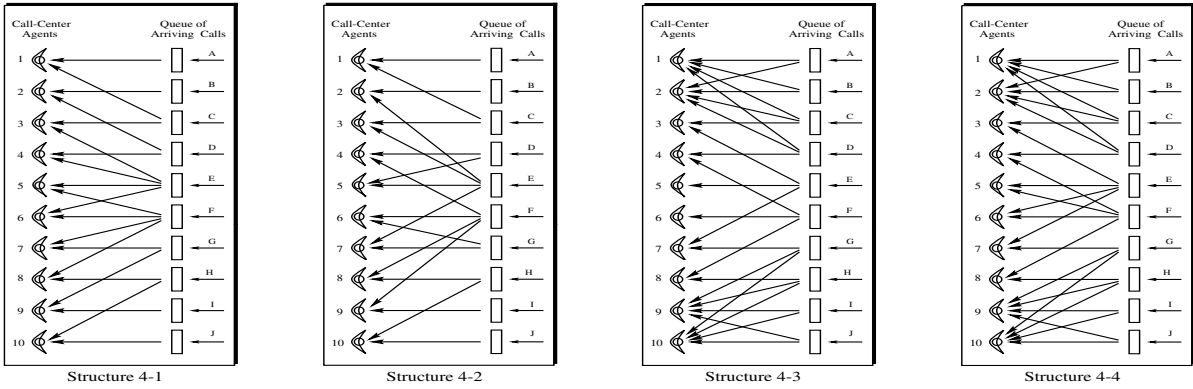

**Figure EC.6** WS Networks for Demand Vector  $\mathcal{D}_4 = (0.5, 0.5, 1, 1, 2, 2, 1, 1, 0.5, 0.5)$

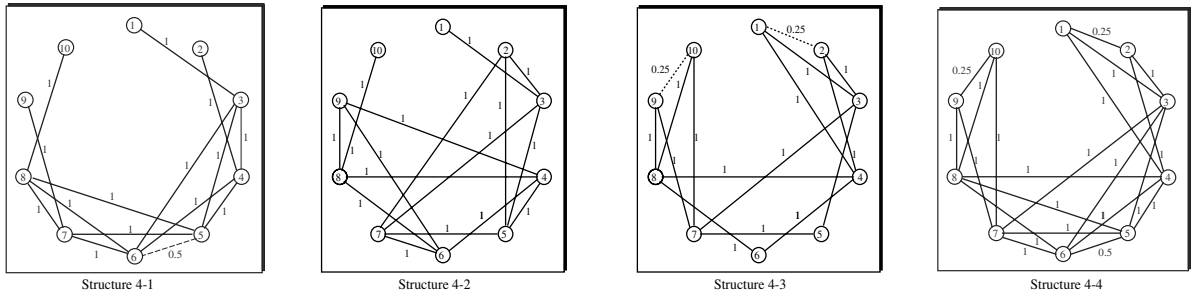

Supplement: mnsc.1060.0621-sm-ec.pdf [file mnsc.1060.0621-sm-ec.pdf]
